# Supplementary material for: Persistent Organic Pollutants and Type 2 Diabetes: A Prospective Analysis in the Nurses’ Health Study and Meta-analysis
Source: PubMed Central journal article supplement (PMC3569682; doi:10.1289/ehp.1205248), 2012-11-05
Supplement: ehp.1205248.s001.pdf [file ehp.1205248.s001.pdf]

## Supplemental Material

Persistent Organic Pollutants and Type 2 Diabetes: A Prospective Analysis in the Nurses' Health Study and Meta-analysis

Hongyu Wu, Kimberly A. Bertrand, Anna L. Choi, Frank B. Hu, Francine Laden, Philippe Grandjean, Qi Sun

### Table of Content

|                                                                                                                                                                                                                                  |    |
|----------------------------------------------------------------------------------------------------------------------------------------------------------------------------------------------------------------------------------|----|
| Search Terms for Meta-analysis.....                                                                                                                                                                                              | 2  |
| Table S1. Characteristics of study participants at baseline in 1990 by cancer status, the Nurses' Health Study.....                                                                                                              | 3  |
| Table S2. Age-adjusted Spearman correlation coefficients between persistent organic pollutants among non-diabetic participants, the Nurses' Health Study.....                                                                    | 5  |
| Table S3. Adjusted ORs (95% CIs) of incident diabetes per SD increment of natural log-transformed lipid-standardized plasma persistent organic pollutant concentrations, the Nurses' Health Study.....                           | 6  |
| Table S4. Adjusted ORs (95% CIs) of incident diabetes according to tertiles of plasma weight-adjusted plasma persistent organic pollutant concentrations (ng/g plasma weight), the Nurses' Health Study.....                     | 8  |
| Table S5. Pooled adjusted ORs (95% CIs) of incident diabetes according to tertiles of plasma weight-adjusted plasma persistent organic pollutant concentrations (ng/g plasma weight), the Nurses' Health Study.....              | 10 |
| Table S6. Adjusted ORs (95% CIs) of incident diabetes according to tertiles of lipid-standardized plasma persistent organic pollutant concentrations (ng/g lipids), the Nurses' Health Study...                                  | 12 |
| Table S7. Adjusted ORs (95% CIs) of incident diabetes according to tertiles of lipid-standardized plasma persistent organic pollutant concentrations (ng/g lipids) among cancer free participants, the Nurses' Health Study..... | 14 |
| Figure S1. Dose-response relationship between concentrations of total PCBs and risk of type 2 diabetes in prospective studies.....                                                                                               | 15 |

## Search Terms for Meta-analysis

### MEDLINE:

("Diabetes Mellitus"[Mesh] OR "diabetes"[All Fields]) AND ("Polychlorinated Biphenyls"[Mesh] OR "DDT"[Mesh] OR "Dichlorodiphenyl Dichloroethylene"[Mesh] OR "Hexachlorobenzene"[Mesh] OR "Hydrocarbons, Chlorinated"[Mesh] OR "Polychlorinated Biphenyls"[All Fields] OR "dichlorodiphenyltrichloroethane"[All Fields] OR "DDT"[All Fields] OR "Dichlorodiphenyl Dichloroethylene"[All Fields] OR "Hexachlorobenzene"[All Fields] OR "PCB"[All Fields] OR "DDE"[All Fields] OR "DDT"[All Fields] OR "HCB"[All Fields] OR "Pollutant"[All Fields] OR "Pesticide"[All Fields] OR "insecticide"[All Fields] OR "persistent organochlorine"[All Fields] OR "organochloride"[All Fields] OR "organochlorine"[All Fields] OR "chlorocarbon"[All Fields] OR "chlorinated hydrocarbon"[All Fields] OR "chlorinated solvent"[All Fields])

### EMBASE:

"Diabetes" AND ( "Polychlorinated Biphenyls" OR "dichlorodiphenyltrichloroethane" OR "DDT" OR "Dichlorodiphenyl Dichloroethylene" OR "Dichlorodiphenyldichloroethylene" OR "Hexachlorobenzene" OR "PCB" OR "DDE" OR "DDT" OR "HCB" OR "organochlorine Pesticide" OR "organochlorine insecticide" OR "persistent organochlorine Pollutant" OR "organochloride" OR "chlorocarbon" OR "chlorinated hydrocarbon" OR "chlorinated solvent")

Table S1. Characteristics of study participants at baseline in 1990 by cancer status, the Nurses' Health Study. <sup>a</sup>

| Variables                                                 | Breast Cancer study     |                            |            | Non-Hodgkin Lymphoma study |                            |         |
|-----------------------------------------------------------|-------------------------|----------------------------|------------|----------------------------|----------------------------|---------|
|                                                           | Cancer cases<br>(n=334) | Cancer controls<br>(n=339) | P<br>value | Cancer cases<br>(n=139)    | Cancer controls<br>(n=283) | P value |
| Age, years                                                | 58.7 ± 6.7              | 58.4 ± 6.8                 | 0.50       | 58.7 ± 6.5                 | 58.8 ± 6.5                 | 0.86    |
| BMI, kg/m <sup>2</sup>                                    | 24.7 ± 4.1              | 25.0 ± 4.4                 | 0.42       | 25.1 ± 4.1                 | 25.0 ± 4.3                 | 0.85    |
| Smoking status, n (%)                                     |                         |                            | 0.57       |                            |                            | 0.64    |
| Never smoked                                              | 147 (44.0)              | 161 (47.5)                 |            | 59 (42.5)                  | 132 (46.6)                 |         |
| Past smoker                                               | 145 (43.4)              | 142 (41.9)                 |            | 92 (44.6)                  | 121 (42.8)                 |         |
| Current smoker                                            | 42 (12.6)               | 36 (10.6)                  |            | 18 (13.0)                  | 30 (10.6)                  |         |
| Alcohol drinking, n (%)                                   |                         |                            | 0.29       |                            |                            | 0.17    |
| 0g/day                                                    | 62 (18.6)               | 59 (17.4)                  |            | 29 (20.9)                  | 83 (29.3)                  |         |
| 0.1-10g/day                                               | 176 (52.7)              | 198 (58.4)                 |            | 78 (56.1)                  | 145 (51.2)                 |         |
| >10g/day                                                  | 96 (28.7)               | 82 (24.2)                  |            | 32 (23.0)                  | 55 (19.4)                  |         |
| Physical activity, MET-hours/week                         | 16.3 ± 15.8             | 18.9 ± 17.2                | 0.04       | 16.5 ± 17.4                | 19.5 ± 38.9                | 0.28    |
| Family history of diabetes, n (%)                         | 80 (24.0)               | 82 (24.2)                  | 0.94       | 39 (28.1)                  | 83 (29.3)                  | 0.79    |
| Number of incident diabetes cases                         | 3                       | 21                         |            | 2                          | 22                         |         |
| Number of deaths                                          | 75                      | 51                         |            | 63                         | 38                         |         |
| Total person-years                                        | 5288                    | 5780                       |            | 2012                       | 4867                       |         |
| Incident rate of type 2 diabetes, case/1,000 person-years | 0.57                    | 3.63                       | <0.001     | 0.99                       | 4.52                       | 0.005   |
| PCB118, ng/g lipid                                        | 65.8 (45.8-86.2)        | 65.6 (47.2-85.6)           | 0.62       | 45.3 (34.1-67.0)           | 50.9 (34.4-78.2)           | 0.03    |
| PCB138, ng/g lipid                                        | 94.6 (67.3-133.0)       | 94.2 (70.6-129.9)          | 0.80       | 64.0 (46.3-83.2)           | 63.4 (43.8-89.3)           | 0.19    |
| PCB153, ng/g lipid                                        | 105.2 (80.2-143.6)      | 104.5 (80.9-140.7)         | 0.63       | 106.7 (79.5-130.8)         | 105.6 (79.0-141.0)         | 0.23    |
| PCB180, ng/g lipid                                        | 76.4 (56.0-100.5)       | 73.3 (57.1-95.1)           | 0.87       | 74.7 (57.3-89.7)           | 70.3 (54.4-90.1)           | 0.41    |
| ∑PCBs (118,138,153,180), ng/g lipid                       | 352.1 (262.7-459.1)     | 341.0 (265.9-448.8)        | 0.88       | 303.1 (227.3-354.4)        | 295.8 (217.8-395.2)        | 0.12    |
| Total PCBs ng/g lipid <sup>b</sup>                        | 768.2 (593.3-961.6)     | 724.0 (564.2-931.9)        | 0.71       | 622.3 (476.7-728.7)        | 618.9 (460.4-811.6)        | 0.50    |
| <i>p,p'</i> -DDT, ng/g lipid                              | 50.6 (33.3-92.4)        | 57.4 (32.2-96.9)           | 0.23       | 42.9 (27.7-69.3)           | 44.2 (28.2-67.2)           | 0.18    |

|                                 |                      |                      |      |                      |                      |      |
|---------------------------------|----------------------|----------------------|------|----------------------|----------------------|------|
| <i>p,p'</i> -DDE, ng/g lipid    | 734.8 (425.9-1209.6) | 810.5 (487.9-1260.1) | 0.02 | 945.1 (617.8-1879.9) | 997.4 (556.2-1672.3) | 0.83 |
| HCB, ng/g lipid                 | 28.9 (21.9-40.0)     | 30.4 (22.9-39.3)     | 0.69 | 35.5 (29.7-44.1)     | 37.2 (30.9-46.4)     | 0.50 |
| Total plasma cholesterol, mg/dL | 11.8 (8.0-16.1)      | 11.8 (8.5-16.6)      | 0.77 | 11.7 (7.8-17.7)      | 12.4 (8.0-19.0)      | 0.10 |
| Plasma triglycerides, mg/dL     | 226.9 (197.0-253.0)  | 228.1 (203.0-253.1)  | 0.45 | 212.0 (186.0-240.0)  | 223.0 (191.0-246.0)  | 0.64 |

Abbreviations: PCB, polychlorinated biphenyls; DDT, *p, p'*-dichlorodiphenyltrichloroethane; DDE, *p, p'*-dichlorodiphenyldichloroethylene; HCB, hexachlorobenzene.

<sup>a</sup> Data are mean  $\pm$  SD or median (inter-quartile range) for continuous variables or % for categorical variables, unless otherwise indicated. *P* values were calculated by *t* tests for continuous variables expressed as mean  $\pm$  SD, Wilcoxon rank-sum tests for continuous variables expressed as median (inter-quartile range), and chi-square tests for categorical variables.

<sup>b</sup> Total PCBs were summed values of 22 PCB congeners in the breast cancer study and 56 PCB congeners in the non-Hodgkin lymphoma study.

Table S2. Age-adjusted Spearman correlation coefficients between persistent organic pollutants among non-diabetic participants, the Nurses' Health Study.

| Breast Cancer study (n=649)        |                     |        |        |        |        |                  |                  |
|------------------------------------|---------------------|--------|--------|--------|--------|------------------|------------------|
|                                    | BMI                 | PCB118 | PCB138 | PCB153 | PCB180 | <i>p,p'</i> -DDT | <i>p,p'</i> -DDE |
| PCB118                             | -0.01 <sup>NS</sup> |        |        |        |        |                  |                  |
| PCB138                             | -0.11               | 0.77   |        |        |        |                  |                  |
| PCB153                             | -0.21               | 0.80   | 0.89   |        |        |                  |                  |
| PCB180                             | -0.26               | 0.56   | 0.69   | 0.77   |        |                  |                  |
| <i>p,p'</i> -DDT                   | 0.004 <sup>NS</sup> | 0.30   | 0.24   | 0.26   | 0.21   |                  |                  |
| <i>p,p'</i> -DDE                   | 0.03 <sup>NS</sup>  | 0.42   | 0.47   | 0.49   | 0.40   | 0.15             |                  |
| HCB                                | -0.02 <sup>NS</sup> | 0.42   | 0.36   | 0.44   | 0.45   | 0.15             | 0.45             |
| Non-Hodgkin Lymphoma study (n=398) |                     |        |        |        |        |                  |                  |
|                                    | BMI                 | PCB118 | PCB138 | PCB153 | PCB180 | <i>p,p'</i> -DDT | <i>p,p'</i> -DDE |
| PCB118                             | 0.17                |        |        |        |        |                  |                  |
| PCB138                             | 0.001 <sup>NS</sup> | 0.79   |        |        |        |                  |                  |
| PCB153                             | -0.10 <sup>NS</sup> | 0.76   | 0.95   |        |        |                  |                  |
| PCB180                             | -0.20               | 0.53   | 0.70   | 0.83   |        |                  |                  |
| <i>p,p'</i> -DDT                   | 0.20                | 0.53   | 0.52   | 0.48   | 0.32   |                  |                  |
| <i>p,p'</i> -DDE                   | 0.07 <sup>NS</sup>  | 0.47   | 0.52   | 0.47   | 0.33   | 0.63             |                  |
| HCB                                | 0.03 <sup>NS</sup>  | 0.42   | 0.38   | 0.42   | 0.46   | 0.40             | 0.49             |

NS, non-statistically significant. All correlation coefficients were adjusted for age at blood draw.  $P < 0.05$  unless indicated as NS.

Table S3. Adjusted ORs (95% CIs) of incident diabetes per SD increment of natural log-transformed lipid-standardized plasma persistent organic pollutant concentrations, the Nurses' Health Study. <sup>a</sup>

| Ln (POP)                         | Breast cancer study |          | Non-Hodgkin lymphoma study |          | Combined          |          |
|----------------------------------|---------------------|----------|----------------------------|----------|-------------------|----------|
|                                  | OR (95% CI)         | <i>P</i> | OR (95% CI)                | <i>P</i> | OR (95% CI)       | <i>P</i> |
| Ln HCB                           |                     |          |                            |          |                   |          |
| Model 1 <sup>b</sup>             | 2.40 (0.85, 6.74)   | 0.10     | 2.53 (0.60, 10.7)          | 0.21     | 2.44 (1.05, 5.66) | 0.04     |
| Model 2 <sup>c</sup>             | 2.11 (0.77, 5.82)   | 0.15     | 3.05 (0.70, 13.3)          | 0.14     | 2.38 (1.03, 5.48) | 0.04     |
| Ln DDE                           |                     |          |                            |          |                   |          |
| Model 1 <sup>b</sup>             | 1.15 (0.65, 2.01)   | 0.64     | 0.95 (0.57, 1.61)          | 0.86     | 1.04 (0.71, 1.52) | 0.85     |
| Model 2 <sup>c</sup>             | 1.06 (0.60, 1.86)   | 0.84     | 1.01 (0.58, 1.76)          | 0.97     | 1.03 (0.70, 1.53) | 0.87     |
| Ln DDT                           |                     |          |                            |          |                   |          |
| Model 1 <sup>b</sup>             | 1.12 (0.65, 1.94)   | 0.68     | 1.15 (0.57, 2.30)          | 0.7      | 1.13 (0.74, 1.74) | 0.57     |
| Model 2 <sup>c</sup>             | 1.09 (0.63, 1.88)   | 0.75     | 1.27 (0.61, 2.62)          | 0.53     | 1.15 (0.74, 1.78) | 0.53     |
| Ln PCB118                        |                     |          |                            |          |                   |          |
| Model 1 <sup>b</sup>             | 1.87 (0.79, 4.40)   | 0.16     | 1.42 (0.66, 3.06)          | 0.37     | 1.60 (0.90, 2.84) | 0.11     |
| Model 2 <sup>c</sup>             | 1.57 (0.65, 3.78)   | 0.31     | 1.31 (0.61, 2.82)          | 0.49     | 1.42 (0.79, 2.53) | 0.24     |
| Ln PCB138                        |                     |          |                            |          |                   |          |
| Model 1 <sup>b</sup>             | 0.95 (0.39, 2.31)   | 0.91     | 0.86 (0.37, 2.00)          | 0.73     | 0.90 (0.49, 1.66) | 0.74     |
| Model 2 <sup>c</sup>             | 0.79 (0.33, 1.93)   | 0.61     | 0.90 (0.39, 2.10)          | 0.81     | 0.85 (0.46, 1.57) | 0.60     |
| Ln PCB153                        |                     |          |                            |          |                   |          |
| Model 1 <sup>b</sup>             | 2.85 (1.11, 7.33)   | 0.03     | 0.83 (0.29, 2.42)          | 0.73     | 1.66 (0.82, 3.37) | 0.16     |
| Model 2 <sup>c</sup>             | 2.37 (0.91, 6.21)   | 0.08     | 0.87 (0.30, 2.56)          | 0.8      | 1.52 (0.74, 3.12) | 0.25     |
| Ln PCB180                        |                     |          |                            |          |                   |          |
| Model 1 <sup>b</sup>             | 1.55 (0.58, 4.15)   | 0.38     | 0.75 (0.21, 2.65)          | 0.65     | 1.18 (0.54, 2.56) | 0.68     |
| Model 2 <sup>c</sup>             | 1.45 (0.53, 3.91)   | 0.47     | 0.84 (0.24, 2.92)          | 0.79     | 1.17 (0.54, 2.54) | 0.69     |
| Ln $\sum$ PCBs (118,138,153,180) |                     |          |                            |          |                   |          |
| Model 1 <sup>b</sup>             | 2.06 (0.76, 5.60)   | 0.16     | 0.95 (0.33, 2.74)          | 0.92     | 1.43 (0.69, 2.96) | 0.34     |
| Model 2 <sup>c</sup>             | 1.72 (0.62, 4.79)   | 0.30     | 0.96 (0.34, 2.77)          | 0.95     | 1.30 (0.62, 2.71) | 0.49     |
| Ln Total PCBs                    |                     |          |                            |          |                   |          |
| Model 1 <sup>b</sup>             | 1.83 (0.63, 5.33)   | 0.27     | 0.97 (0.30, 3.17)          | 0.96     | 1.37 (0.62, 3.04) | 0.43     |
| Model 2 <sup>c</sup>             | 1.52 (0.51, 4.50)   | 0.45     | 1.02 (0.32, 3.26)          | 0.98     | 1.26 (0.57, 2.79) | 0.57     |

| Ln Total POPs        |                   |      |                   |      |                   |      |
|----------------------|-------------------|------|-------------------|------|-------------------|------|
| Model 1 <sup>b</sup> | 1.36 (0.53, 3.52) | 0.52 | 1.02 (0.46, 2.30) | 0.96 | 1.25 (0.54, 2.90) | 0.61 |
| Model 2 <sup>c</sup> | 1.62 (0.64, 4.13) | 0.31 | 1.13 (0.49, 2.63) | 0.78 | 1.55 (0.68, 3.54) | 0.30 |

Abbreviations: PCB, polychlorinated biphenyls; DDT, *p, p'*-dichlorodiphenyltrichloroethane; DDE, *p, p'*-dichlorodiphenyldichloroethylene; HCB, hexachlorobenzene, POP, persistent organic pollutants.

<sup>a</sup> ORs (95% CIs) were estimated using logistic regression. The combined results were derived using a fixed-effects model. Total PCBs were summed values of 22 PCB congeners in the breast cancer study and 56 PCB congeners in the non-Hodgkin lymphoma study.

<sup>b</sup> Model 1: adjusted for age (years), smoking status (never/current smoker/ past smoker), alcohol intake (g/d: 0, 0.1-10 and >10), physical activity (MET-hours/week), family history of diabetes (yes/no), baseline BMI in 1990, total plasma cholesterol (mg/dL), and plasma triglyceride (mg/dL).

<sup>c</sup> Model 2: further adjusted for cancer case-control status.

Table S4. Adjusted ORs (95% CIs) of incident diabetes according to tertiles of plasma weight-adjusted plasma persistent organic pollutant concentrations (ng/g plasma weight), the Nurses' Health Study.<sup>a</sup>

| POP                    | Breast cancer study |                   |                   |                    | Non-Hodgkin lymphoma study |                   |                   |                    |
|------------------------|---------------------|-------------------|-------------------|--------------------|----------------------------|-------------------|-------------------|--------------------|
|                        | Tertile 1           | Tertile 2         | Tertile 3         | <i>P</i> for trend | Tertile 1                  | Tertile 2         | Tertile 3         | <i>P</i> for trend |
| <b>HCB<sup>b</sup></b> |                     |                   |                   |                    |                            |                   |                   |                    |
| Median                 | 0.15                | 0.24              | 0.35              |                    | 0.20                       | 0.28              | 0.38              |                    |
| Case/control           | 6/330               | 8/161             | 10/158            |                    | 5/206                      | 10/96             | 9/96              |                    |
| Model 1 <sup>c</sup>   | 1.00                | 3.60 (1.03, 12.6) | 4.21 (1.15, 15.4) | 0.03               | 1.00                       | 3.91 (1.16, 13.2) | 3.35 (0.91, 12.4) | 0.07               |
| Model 2 <sup>d</sup>   | 1.00                | 2.68 (0.75, 9.55) | 3.98 (1.10, 14.5) | 0.03               | 1.00                       | 4.07 (1.17, 14.1) | 3.75 (0.98, 14.5) | 0.06               |
| <i>p,p'</i> -DDE       |                     |                   |                   |                    |                            |                   |                   |                    |
| Median                 | 2.35                | 5.42              | 10.37             |                    | 2.84                       | 6.84              | 14.70             |                    |
| Case/control           | 8/216               | 6/219             | 10/214            |                    | 5/135                      | 6/135             | 13/128            |                    |
| Model 1 <sup>c</sup>   | 1.00                | 0.74 (0.23, 2.37) | 1.01 (0.33, 2.13) | 0.92               | 1.00                       | 0.79 (0.22, 2.86) | 1.64 (0.51, 5.27) | 0.25               |
| Model 2 <sup>d</sup>   | 1.00                | 0.62 (0.18, 2.14) | 0.91 (0.29, 2.92) | 0.98               | 1.00                       | 0.66 (0.18, 2.51) | 1.69 (0.52, 5.49) | 0.19               |
| <i>p,p'</i> -DDT       |                     |                   |                   |                    |                            |                   |                   |                    |
| Median                 | 0.19                | 0.38              | 0.81              |                    | 0.15                       | 0.30              | 0.58              |                    |
| Case/control           | 8/216               | 4/221             | 12/212            |                    | 4/136                      | 7/134             | 13/128            |                    |
| Model 1 <sup>c</sup>   | 1.00                | 0.39 (0.10, 1.46) | 1.14 (0.41, 3.20) | 0.47               | 1.00                       | 1.11 (0.29, 4.26) | 1.78 (0.50, 6.32) | 0.29               |
| Model 2 <sup>d</sup>   | 1.00                | 0.42 (0.11, 1.65) | 1.01 (0.35, 2.90) | 0.69               | 1.00                       | 0.92 (0.23, 3.64) | 1.64 (0.46, 5.84) | 0.30               |
| PCB118                 |                     |                   |                   |                    |                            |                   |                   |                    |
| Median                 | 0.28                | 0.46              | 0.73              |                    | 0.20                       | 0.34              | 0.61              |                    |
| Case/control           | 4/220               | 7/218             | 13/211            |                    | 4/136                      | 7/134             | 13/128            |                    |
| Model 1 <sup>c</sup>   | 1.00                | 2.16 (0.57, 8.11) | 3.22 (0.87, 12.0) | 0.09               | 1.00                       | 1.47 (0.37, 5.82) | 2.54 (0.65, 9.94) | 0.15               |
| Model 2 <sup>d</sup>   | 1.00                | 2.22 (0.58, 8.47) | 2.75 (0.72, 10.5) | 0.16               | 1.00                       | 1.41 (0.34, 5.80) | 2.32 (0.57, 9.50) | 0.21               |
| PCB138                 |                     |                   |                   |                    |                            |                   |                   |                    |
| Median                 | 0.42                | 0.66              | 1.05              |                    | 0.26                       | 0.42              | 0.70              |                    |
| Case/control           | 5/219               | 9/216             | 10/214            |                    | 4/136                      | 11/130            | 9/132             |                    |
| Model 1 <sup>c</sup>   | 1.00                | 1.44 (0.43, 4.87) | 1.72 (0.49, 6.05) | 0.42               | 1.00                       | 2.01 (0.59, 6.93) | 1.09 (0.28, 4.19) | 0.74               |
| Model 2 <sup>d</sup>   | 1.00                | 1.44 (0.42, 4.95) | 1.60 (0.45, 5.68) | 0.50               | 1.00                       | 2.41 (0.68, 8.58) | 1.07 (0.27, 4.23) | 0.64               |
| PCB153                 |                     |                   |                   |                    |                            |                   |                   |                    |
| Median                 | 0.48                | 0.75              | 1.13              |                    | 0.47                       | 0.73              | 1.07              |                    |
| Case/control           | 5/219               | 9/215             | 10/215            |                    | 6/134                      | 9/132             | 9/132             |                    |



|                             |       |                   |                   |      |       |                   |                   |      |
|-----------------------------|-------|-------------------|-------------------|------|-------|-------------------|-------------------|------|
| Model 1 <sup>c</sup>        | 1.00  | 1.92 (0.56, 6.55) | 2.55 (0.68, 9.55) | 0.18 | 1.00  | 1.24 (0.40, 3.87) | 0.80 (0.23, 2.74) | 0.63 |
| Model 2 <sup>d</sup>        | 1.00  | 1.89 (0.54, 6.61) | 2.31 (0.60, 8.88) | 0.25 | 1.00  | 1.31 (0.42, 4.15) | 0.72 (0.20, 2.55) | 0.52 |
| PCB180                      |       |                   |                   |      |       |                   |                   |      |
| Median                      | 0.35  | 0.52              | 0.76              |      | 0.34  | 0.49              | 0.69              |      |
| Case/control                | 7/217 | 9/216             | 8/216             |      | 9/131 | 5/136             | 10/131            |      |
| Model 1 <sup>c</sup>        | 1.00  | 1.36 (0.44, 4.20) | 1.07 (0.28, 4.07) | 0.94 | 1.00  | 0.46 (0.13, 1.62) | 0.78 (0.23, 2.70) | 0.86 |
| Model 2 <sup>d</sup>        | 1.00  | 1.33 (0.42, 4.26) | 1.02 (0.25, 4.15) | 0.98 | 1.00  | 0.44 (0.12, 1.61) | 0.84 (0.23, 3.06) | 0.97 |
| Σ PCBs (118, 138, 153, 180) |       |                   |                   |      |       |                   |                   |      |
| Median                      | 1.57  | 2.41              | 3.63              |      | 1.35  | 2.00              | 2.99              |      |
| Case/control                | 6/218 | 8/217             | 10/214            |      | 4/136 | 11/130            | 9/132             |      |
| Model 1 <sup>c</sup>        | 1.00  | 1.32 (0.40, 4.39) | 1.48 (0.42, 5.29) | 0.57 | 1.00  | 2.02 (0.58, 6.98) | 1.20 (0.30, 4.72) | 0.91 |
| Model 2 <sup>d</sup>        | 1.00  | 1.31 (0.38, 4.47) | 1.41 (0.39, 5.14) | 0.63 | 1.00  | 2.32 (0.65, 8.29) | 1.15 (0.28, 4.70) | 0.79 |
| Total PCBs                  |       |                   |                   |      |       |                   |                   |      |
| Median                      | 3.52  | 5.17              | 7.64              |      | 2.86  | 4.24              | 6.18              |      |
| Case/control                | 4/220 | 12/213            | 8/216             |      | 4/136 | 9/132             | 11/130            |      |
| Model 1 <sup>c</sup>        | 1.00  | 3.64 (1.02, 13.0) | 1.53 (0.36, 6.43) | 0.91 | 1.00  | 1.65 (0.45, 6.02) | 1.54 (0.38, 6.23) | 0.65 |
| Model 2 <sup>d</sup>        | 1.00  | 4.06 (1.08, 15.3) | 1.53 (0.35, 6.58) | 0.93 | 1.00  | 1.78 (0.48, 6.68) | 1.44 (0.35, 6.01) | 0.78 |
| Total POPs                  |       |                   |                   |      |       |                   |                   |      |
| Median                      | 7.19  | 11.8              | 18.5              |      | 6.75  | 12.2              | 21.5              |      |
| Case/control                | 6/218 | 7/218             | 11/213            |      | 5/135 | 8/133             | 11/130            |      |
| Model 1 <sup>c</sup>        | 1.00  | 1.15 (0.34, 3.88) | 1.53 (0.46, 5.16) | 0.47 | 1.00  | 1.02 (0.30, 3.48) | 1.23 (0.36, 4.19) | 0.71 |
| Model 2 <sup>d</sup>        | 1.00  | 1.00 (0.29, 3.45) | 1.22 (0.35, 4.27) | 0.73 | 1.00  | 0.88 (0.25, 3.13) | 1.31 (0.38, 4.56) | 0.56 |

<sup>a</sup> ORs (95% CIs) were estimated using logistic regression. Total PCBs were summed values of 22 PCB congeners in the breast cancer study and 56 PCB congeners in the non-Hodgkin lymphoma study.

<sup>b</sup> In order to include T2D cases in the lowest tertile of HCB, participants were categorized using the following cutpoints: ≤ median, median to 75 percentile, and ≥75 percentile.

<sup>c</sup> Model 1: adjusted for age (years), smoking status (never/current smoker/ past smoker), alcohol intake (g/d: 0, 0.1-10 and >10), physical activity (MET-hours/week), family history of diabetes (yes/no), baseline BMI in 1990, total plasma cholesterol (mg/dL), and plasma triglycerides (mg/dL).

<sup>d</sup> Model 2: further adjusted for cancer case-control status.

Table S5. Pooled adjusted ORs (95% CIs) of incident diabetes according to tertiles of plasma weight-adjusted plasma persistent organic pollutant concentrations (ng/g plasma weight), the Nurses' Health Study. <sup>a</sup>

| POP                                | Combined  |                   |                   | <i>P</i> for trend |
|------------------------------------|-----------|-------------------|-------------------|--------------------|
|                                    | Tertile 1 | Tertile 2         | Tertile 3         |                    |
| <b>HCB<sup>b</sup></b>             |           |                   |                   |                    |
| Case/control                       | 11/536    | 18/257            | 19/254            |                    |
| Model 1 <sup>c</sup>               | 1.00      | 3.76 (1.57, 9.00) | 3.76 (1.50, 9.44) | 0.005              |
| Model 2 <sup>d</sup>               | 1.00      | 3.32 (1.36, 8.07) | 3.87 (1.52, 9.83) | 0.004              |
| <b><i>p,p'</i>-DDE</b>             |           |                   |                   |                    |
| Case/control                       | 13/351    | 12/354            | 23/342            |                    |
| Model 1 <sup>c</sup>               | 1.00      | 0.76 (0.32, 1.82) | 1.25 (0.55, 2.81) | 0.33               |
| Model 2 <sup>d</sup>               | 1.00      | 0.63 (0.26, 1.57) | 1.24 (0.54, 2.83) | 0.27               |
| <b><i>p,p'</i>-DDT</b>             |           |                   |                   |                    |
| Case/control                       | 12/352    | 11/355            | 25/340            |                    |
| Model 1 <sup>c</sup>               | 1.00      | 0.64 (0.25, 1.65) | 1.31 (0.59, 2.91) | 0.28               |
| Model 2 <sup>d</sup>               | 1.00      | 0.62 (0.23, 1.63) | 1.21 (0.54, 2.74) | 0.39               |
| <b>PCB118</b>                      |           |                   |                   |                    |
| Case/control                       | 8/356     | 14/352            | 26/339            |                    |
| Model 1 <sup>c</sup>               | 1.00      | 1.76 (0.68, 4.56) | 2.77 (1.08, 7.12) | 0.03               |
| Model 2 <sup>d</sup>               | 1.00      | 1.78 (0.67, 4.70) | 2.52 (0.95, 6.67) | 0.06               |
| <b>PCB138</b>                      |           |                   |                   |                    |
| Case/control                       | 9/355     | 20/346            | 19/346            |                    |
| Model 1 <sup>c</sup>               | 1.00      | 1.69 (0.71, 4.03) | 1.37 (0.55, 3.43) | 0.66               |
| Model 2 <sup>d</sup>               | 1.00      | 1.87 (0.77, 4.54) | 1.35 (0.53, 3.42) | 0.75               |
| <b>PCB153</b>                      |           |                   |                   |                    |
| Case/control                       | 11/353    | 18/347            | 19/347            |                    |
| Model 1 <sup>c</sup>               | 1.00      | 1.51 (0.66, 3.48) | 1.35 (0.54, 3.33) | 0.53               |
| Model 2 <sup>d</sup>               | 1.00      | 1.56 (0.67, 3.64) | 1.26 (0.50, 3.18) | 0.65               |
| <b>PCB180</b>                      |           |                   |                   |                    |
| Case/control                       | 16/348    | 14/352            | 18/347            |                    |
| Model 1 <sup>c</sup>               | 1.00      | 0.85 (0.37, 1.97) | 0.89 (0.36, 2.22) | 0.93               |
| Model 2 <sup>d</sup>               | 1.00      | 0.83 (0.35, 1.96) | 0.94 (0.36, 2.43) | 0.97               |
| <b>Σ PCBs (118, 138, 153, 180)</b> |           |                   |                   |                    |
| Case/control                       | 10/354    | 19/347            | 19/347            |                    |
| Model 1 <sup>c</sup>               | 1.00      | 1.62 (0.68, 3.82) | 1.31 (0.51, 3.33) | 0.75               |
| Model 2 <sup>d</sup>               | 1.00      | 1.76 (0.73, 4.26) | 1.29 (0.50, 3.37) | 0.83               |
| <b>Total PCBs</b>                  |           |                   |                   |                    |
| Case/control                       | 8/356     | 21/345            | 19/346            |                    |
| Model 1 <sup>c</sup>               | 1.00      | 2.37 (0.96, 5.83) | 1.47 (0.54, 4.00) | 0.77               |
| Model 2 <sup>d</sup>               | 1.00      | 2.60 (1.03, 6.57) | 1.45 (0.52, 4.03) | 0.82               |
| <b>Total POPs</b>                  |           |                   |                   |                    |
| Case/control                       | 11/353    | 15/351            | 22/343            |                    |
| Model 1 <sup>c</sup>               | 1.00      | 1.08 (0.45, 2.57) | 1.36 (0.58, 3.22) | 0.47               |
| Model 2 <sup>d</sup>               | 1.00      | 0.94 (0.39, 2.29) | 1.29 (0.54, 3.11) | 0.47               |

- <sup>a</sup> ORs (95% CIs) were estimated using logistic regression. The combined results were derived using a fixed-effects model. Total PCBs were summed values of 22 PCB congeners in the breast cancer study and 56 PCB congeners in the non-Hodgkin lymphoma study.
- <sup>b</sup> In order to include T2D cases in the lowest tertile of HCB, participants were categorized using the following cutpoints:  $\leq$  median, median to 75 percentile, and  $\geq$ 75 percentile.
- <sup>c</sup> Model 1: adjusted for age (years), smoking status (never/current smoker/ past smoker), alcohol intake (g/d: 0, 0.1-10 and >10), physical activity (MET-hours/week), family history of diabetes (yes/no), baseline BMI in 1990, total plasma cholesterol (mg/dL), and plasma triglycerides (mg/dL).
- <sup>d</sup> Model 2: further adjusted for cancer case-control status.

Table S6. Adjusted ORs (95% CIs) of incident diabetes according to tertiles of lipid-standardized plasma persistent organic pollutant concentrations (ng/g lipids), the Nurses' Health Study.<sup>a</sup>

| Pooled datasets of breast cancer study and non-Hodgkin lymphoma study |           |                   |                   |                    |
|-----------------------------------------------------------------------|-----------|-------------------|-------------------|--------------------|
| POP                                                                   | Tertile 1 | Tertile 2         | Tertile 3         | <i>P</i> for trend |
| <b>HCB</b>                                                            |           |                   |                   |                    |
| Case/control                                                          | 8/349     | 17/349            | 23/349            |                    |
| Model 1 <sup>b</sup>                                                  | 1.00      | 2.14 (0.86, 5.32) | 3.79 (1.54, 9.34) | 0.003              |
| Model 2 <sup>c</sup>                                                  | 1.00      | 1.89 (0.75, 4.79) | 3.35 (1.34, 8.37) | 0.007              |
| <i>p,p'</i> -DDE                                                      |           |                   |                   |                    |
| Case/control                                                          | 11/349    | 19/349            | 18/349            |                    |
| Model 1 <sup>b</sup>                                                  | 1.00      | 1.67 (0.76, 3.65) | 1.47 (0.65, 3.29) | 0.39               |
| Model 2 <sup>c</sup>                                                  | 1.00      | 1.53 (0.68, 3.43) | 1.51 (0.66, 3.44) | 0.35               |
| <i>p,p'</i> -DDT                                                      |           |                   |                   |                    |
| Case/control                                                          | 14/349    | 15/349            | 19/349            |                    |
| Model 1 <sup>b</sup>                                                  | 1.00      | 0.92 (0.42, 1.98) | 1.03 (0.49, 2.18) | 0.93               |
| Model 2 <sup>c</sup>                                                  | 1.00      | 0.98 (0.45, 2.16) | 1.06 (0.49, 2.27) | 0.88               |
| <b>PCB118</b>                                                         |           |                   |                   |                    |
| Case/control                                                          | 11/349    | 17/349            | 20/349            |                    |
| Model 1 <sup>b</sup>                                                  | 1.00      | 1.52 (0.67, 3.45) | 1.66 (0.73, 3.77) | 0.24               |
| Model 2 <sup>c</sup>                                                  | 1.00      | 1.50 (0.65, 3.47) | 1.58 (0.68, 3.64) | 0.31               |
| <b>PCB138</b>                                                         |           |                   |                   |                    |
| Case/control                                                          | 15/349    | 17/349            | 16/349            |                    |
| Model 1 <sup>b</sup>                                                  | 1.00      | 1.06 (0.51, 2.23) | 1.12 (0.53, 2.40) | 0.76               |
| Model 2 <sup>c</sup>                                                  | 1.00      | 1.04 (0.49, 2.23) | 1.07 (0.49, 2.34) | 0.86               |
| <b>PCB153</b>                                                         |           |                   |                   |                    |
| Case/control                                                          | 15/349    | 17/349            | 16/349            |                    |
| Model 1 <sup>b</sup>                                                  | 1.00      | 1.13 (0.53, 2.41) | 1.44 (0.66, 3.15) | 0.37               |
| Model 2 <sup>c</sup>                                                  | 1.00      | 1.16 (0.54, 2.53) | 1.39 (0.62, 3.11) | 0.42               |
| <b>PCB180</b>                                                         |           |                   |                   |                    |
| Case/control                                                          | 17/349    | 19/349            | 12/349            |                    |
| Model 1 <sup>b</sup>                                                  | 1.00      | 1.49 (0.72, 3.07) | 1.23 (0.53, 2.86) | 0.56               |
| Model 2 <sup>c</sup>                                                  | 1.00      | 1.46 (0.69, 3.08) | 1.33 (0.56, 3.17) | 0.48               |
| <b>∑ PCBs (118,138,153,180)</b>                                       |           |                   |                   |                    |
| Case/control                                                          | 15/349    | 17/349            | 16/349            |                    |
| Model 1 <sup>b</sup>                                                  | 1.00      | 1.13 (0.54, 2.39) | 1.20 (0.55, 2.59) | 0.65               |
| Model 2 <sup>c</sup>                                                  | 1.00      | 1.14 (0.53, 2.45) | 1.19 (0.54, 2.63) | 0.66               |
| <b>Total PCBs</b>                                                     |           |                   |                   |                    |
| Case/control                                                          | 15/349    | 17/349            | 16/349            |                    |
| Model 1 <sup>b</sup>                                                  | 1.00      | 1.23 (0.58, 2.60) | 1.24 (0.57, 2.70) | 0.58               |
| Model 2 <sup>c</sup>                                                  | 1.00      | 1.41 (0.65, 3.04) | 1.24 (0.56, 2.76) | 0.59               |
| <b>Total POPs</b>                                                     |           |                   |                   |                    |
| Case/control                                                          | 11/349    | 16/349            | 21/349            |                    |
| Model 1 <sup>b</sup>                                                  | 1.00      | 1.55 (0.69, 3.49) | 2.01 (0.91, 4.44) | 0.09               |
| Model 2 <sup>c</sup>                                                  | 1.00      | 1.39 (0.62, 3.19) | 1.86 (0.83, 4.17) | 0.13               |

<sup>a</sup> ORs (95% CIs) were estimated using logistic regression. Before pooling individual-level data of the non-Hodgkin lymphoma and breast cancer studies, within each dataset, a standardized score of each persistent organic pollutant was computed by using Rosner's non-parametric approach, the derived scores were then used to represent its distribution. Total PCBs were summed values of 22 PCB congeners in the breast cancer study and 56 PCB congeners in the non-Hodgkin lymphoma study.

<sup>b</sup> Model 1: adjusted for age (years), smoking status (never/current smoker/ past smoker), alcohol intake (g/d: 0, 0.1-10 and >10), physical activity (MET-hours/week), family history of diabetes (yes/no), baseline BMI in 1990, and data source (breast cancer study/ non-Hodgkin lymphoma study).

<sup>c</sup> Model 2: further adjusted for cancer case-control status.

Table S7. Adjusted ORs (95% CIs) of incident diabetes according to tertiles of lipid-standardized plasma persistent organic pollutant concentrations (ng/g lipids) among cancer free participants, the Nurses' Health Study.<sup>a</sup>

| POP                             | Combined datasets of breast cancer study and non-Hodgkin lymphoma study |                   |                   | <i>P</i> for trend |
|---------------------------------|-------------------------------------------------------------------------|-------------------|-------------------|--------------------|
|                                 | Tertile 1                                                               | Tertile 2         | Tertile 3         |                    |
| <b>HCB</b>                      |                                                                         |                   |                   |                    |
| Case/control                    | 10/193                                                                  | 13/193            | 20/193            |                    |
| Model 1 <sup>b</sup>            | 1.00                                                                    | 1.10 (0.43, 2.80) | 2.47 (1.02, 5.99) | 0.03               |
| <b>DDE</b>                      |                                                                         |                   |                   |                    |
| Case/control                    | 9/193                                                                   | 17/193            | 17/193            |                    |
| Model 1 <sup>b</sup>            | 1.00                                                                    | 1.78 (0.74, 4.30) | 1.85 (0.77, 4.49) | 0.19               |
| <b>DDT</b>                      |                                                                         |                   |                   |                    |
| Case/control                    | 12/193                                                                  | 14/193            | 17/193            |                    |
| Model 1 <sup>b</sup>            | 1.00                                                                    | 1.07 (0.46, 2.46) | 1.15 (0.51, 2.59) | 0.74               |
| <b>PCB118</b>                   |                                                                         |                   |                   |                    |
| Case/control                    | 10/193                                                                  | 15/193            | 18/193            |                    |
| Model 1 <sup>b</sup>            | 1.00                                                                    | 1.35 (0.56, 3.26) | 1.46 (0.61, 3.53) | 0.41               |
| <b>PCB138</b>                   |                                                                         |                   |                   |                    |
| Case/control                    | 15/193                                                                  | 15/193            | 14/193            |                    |
| Model 1 <sup>b</sup>            | 1.00                                                                    | 0.87 (0.39, 1.95) | 0.93 (0.41, 2.09) | 0.85               |
| <b>PCB153</b>                   |                                                                         |                   |                   |                    |
| Case/control                    | 14/193                                                                  | 15/193            | 14/193            |                    |
| Model 1 <sup>b</sup>            | 1.00                                                                    | 1.04 (0.46, 2.36) | 1.28 (0.54, 3.01) | 0.58               |
| <b>PCB180</b>                   |                                                                         |                   |                   |                    |
| Case/control                    | 16/193                                                                  | 14/193            | 13/193            |                    |
| Model 1 <sup>b</sup>            | 1.00                                                                    | 1.20 (0.53, 2.73) | 1.41 (0.58, 3.44) | 0.45               |
| <b>∑ PCBs (118,138,153,180)</b> |                                                                         |                   |                   |                    |
| Case/control                    | 14/193                                                                  | 15/193            | 14/193            |                    |
| Model 1 <sup>b</sup>            | 1.00                                                                    | 1.05 (0.47, 2.35) | 1.06 (0.46, 2.48) | 0.89               |
| <b>Total PCBs</b>               |                                                                         |                   |                   |                    |
| Case/control                    | 12/193                                                                  | 18/193            | 13/193            |                    |
| Model 1 <sup>b</sup>            | 1.00                                                                    | 1.66 (0.73, 3.76) | 1.20 (0.49, 2.92) | 0.74               |
| <b>Total POPs</b>               |                                                                         |                   |                   |                    |
| Case/control                    | 9/193                                                                   | 16/193            | 18/193            |                    |
| Model 1 <sup>b</sup>            | 1.00                                                                    | 1.88 (0.77, 4.58) | 2.12 (0.87, 5.13) | 0.11               |

<sup>a</sup> ORs (95% CIs) were estimated using logistic regression. Before combining individual-level data from the non-Hodgkin lymphoma and breast cancer studies, within each dataset, a standardized score of each persistent organic pollutant was computed by using Rosner's non-parametric approach. The derived scores were then used to represent its distribution. Total PCBs were summed values of 22 PCB congeners in the breast cancer study and 56 PCB congeners in the non-Hodgkin lymphoma study.

<sup>b</sup>Model 1: adjusted for age (years), smoking status (never/current smoker/ past smoker), alcohol intake (g/d: 0, 0.1-10 and >10), physical activity (MET-hours/week), family history of diabetes (yes/no), and baseline BMI in 1990.

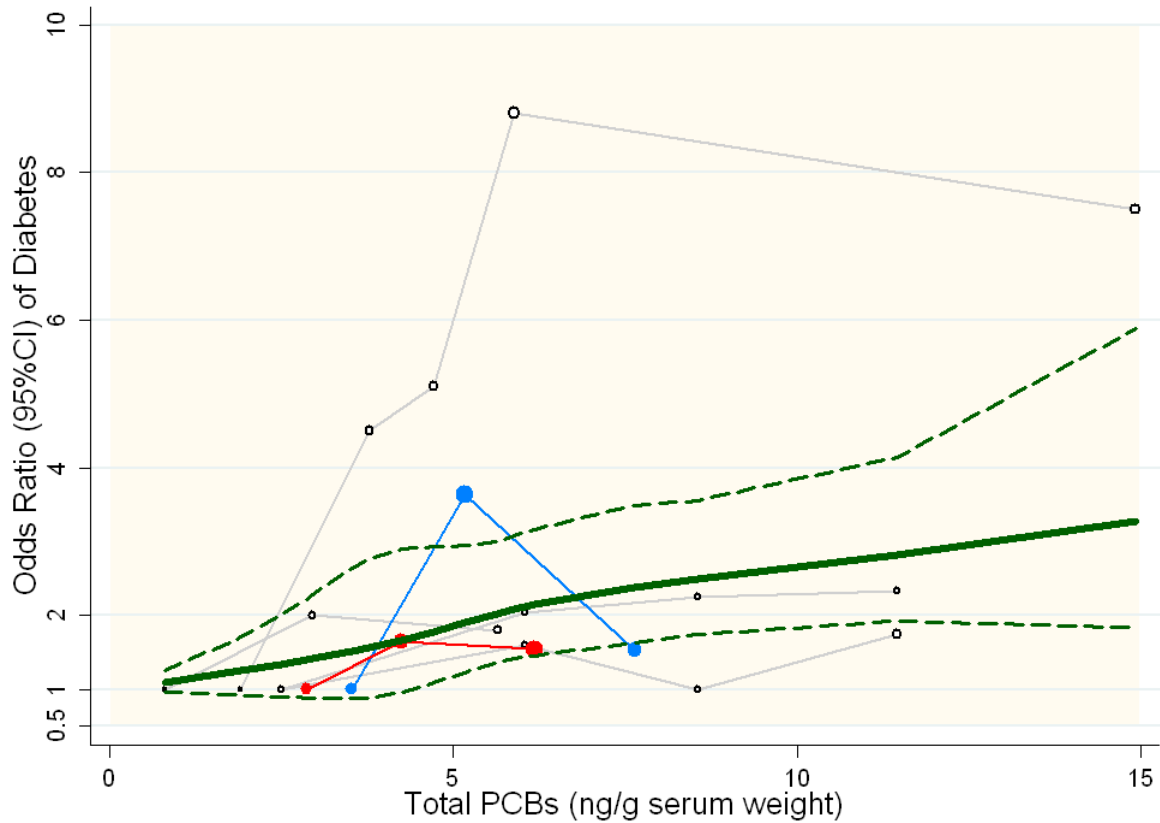

Figure S1. Dose-response relationship between concentrations of total PCBs and risk of type 2 diabetes in prospective studies. Solid line represents point estimates of association between total PCBs and diabetes risk, derived by using generalized least-squares method for trend estimation of summarized dose-response data; dashed lines are 95% CI of the point estimates. Filled blue circles and red circles are odds ratios corresponding to comparison categories in the breast cancer study and non-Hodgkin lymphoma study, respectively. The open circles are odds ratios from other contributing prospective studies (grey lines from top to bottom are Lee et al. 2011; Turyk et al. 2009; men and women in Vasiliu et al. 2006). Yucheng cohort (Wang et al. 2008) was excluded from this the dose-response analysis because this study included subjects who were poisoned by exposure to extraordinarily-high levels of PCBs and polychlorinated dibenzofurans (PCDFs) in contaminated cooking oil.
